# Supplementary material for: Shifts in gut microbiome and metabolome are associated with risk of recurrent atrial fibrillation
Source: PubMed Central journal article supplement (PMC7701499; doi:10.1111/jcmm.15959), 2020-10-14

**a** CTR vs. non-RAF vs. RAF (genus)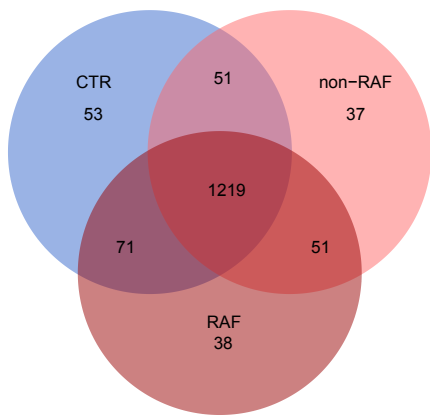**b** CTR vs. non-RAF vs. RAF (species)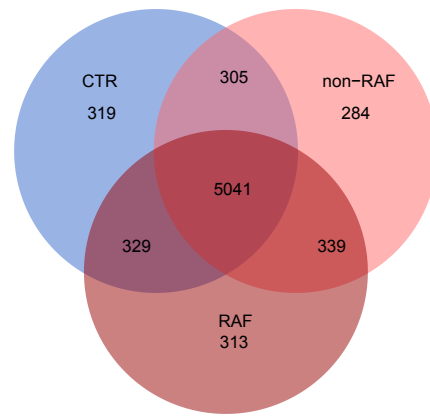**c** CTR vs. non-RAF vs. RAF (genus)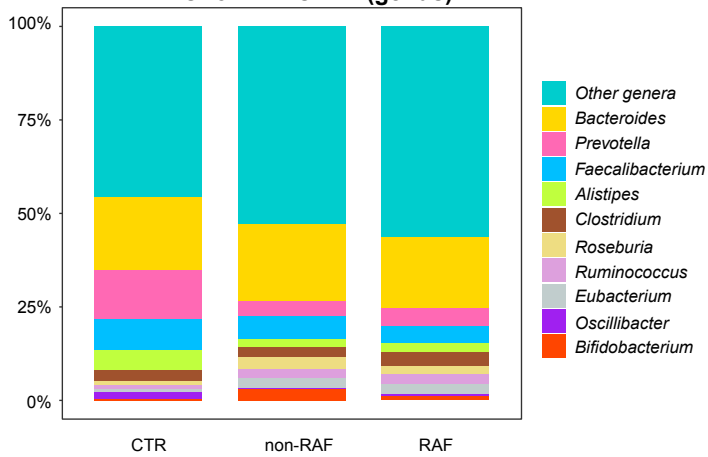**d** CTR vs. non-RAF vs. RAF (species)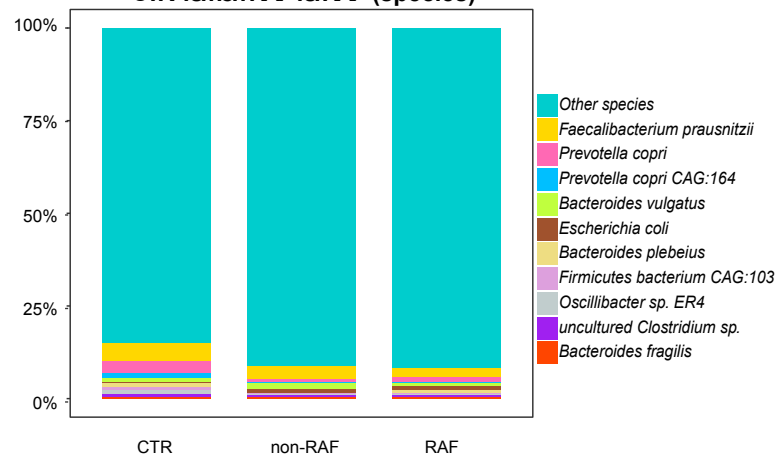**e** CTR vs. non-RAF vs. RAF (genus)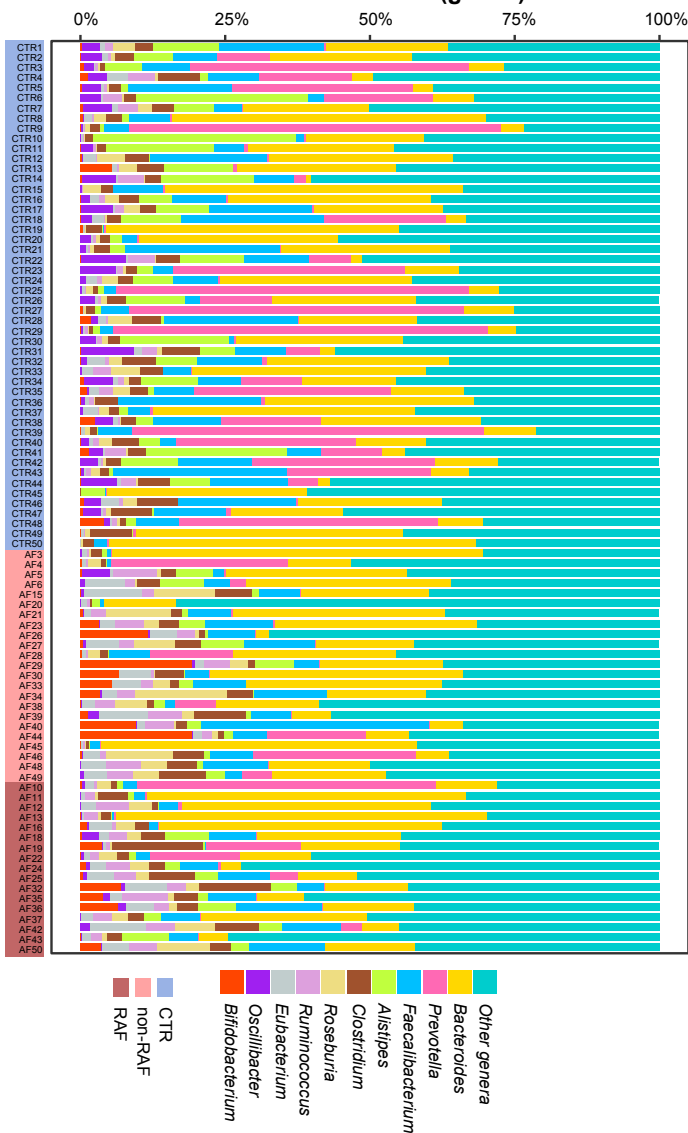**f** CTR vs. non-RAF vs. RAF (species)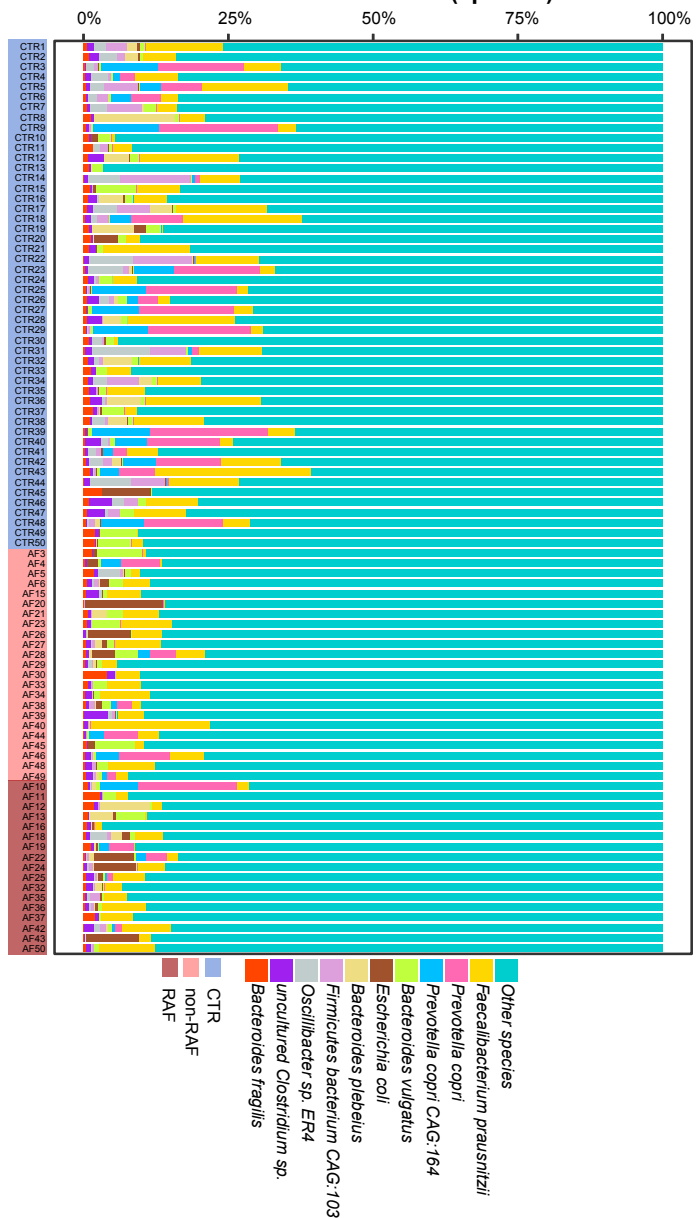

Supplement: JCMM-24-13356-s001.pdf [file JCMM-24-13356-s001.pdf]
