# Supplementary material for: Shifts in gut microbiome and metabolome are associated with risk of recurrent atrial fibrillation
Source: PubMed Central journal article supplement (PMC7701499; doi:10.1111/jcmm.15959), 2020-10-14

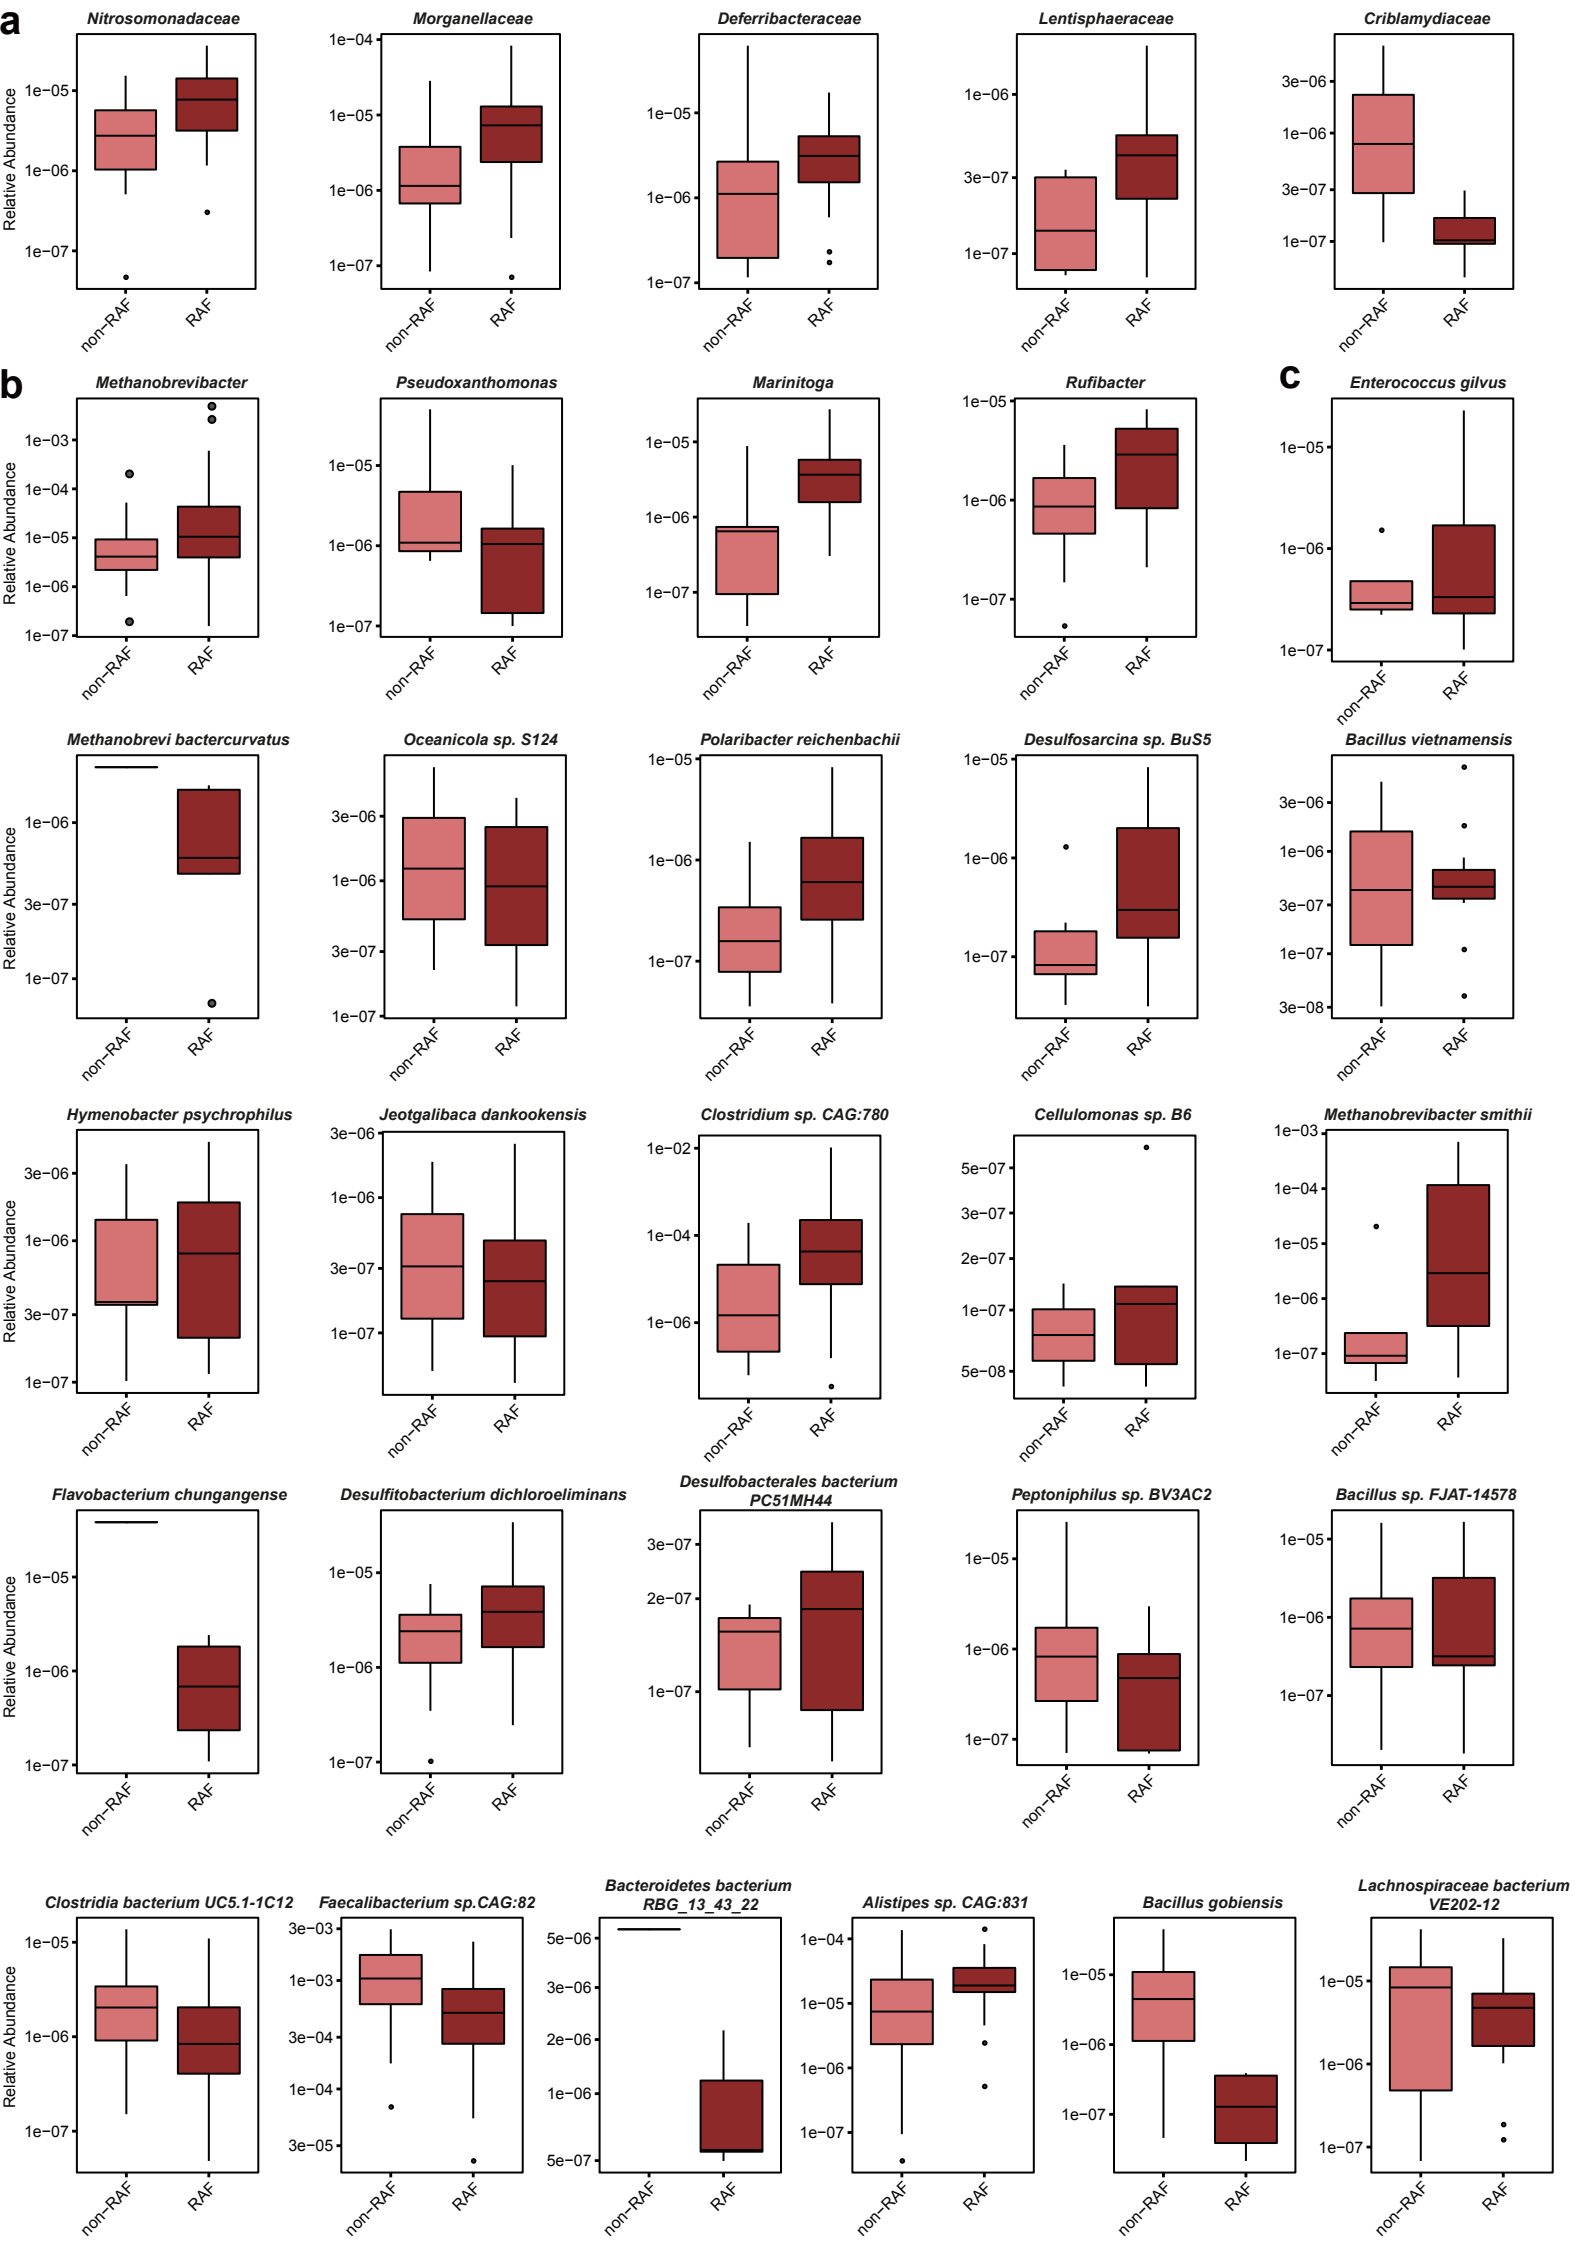

Supplement: JCMM-24-13356-s002.pdf [file JCMM-24-13356-s002.pdf]
